# Supplementary material
Source: publisher figshare collection journal article supplement (https://acs.figshare.com/ndownloader/files/3581676)

Supporting Information

Gene Expression Profiling in *Daphnia magna* Part 1: Concentration Dependent Profiles Provide Support for a No Observed Transcriptional Effect Level

Helen C. Poynton, Alexandre V. Loguinov, Julia R. Varshavsky, Sarah Chan,  
Edward J. Perkins and Chris D. Vulpe

**Table S1:** Description of exposure levels for microarray hybridizations

| Exposure level        | Description                                                                                                                  |
|-----------------------|------------------------------------------------------------------------------------------------------------------------------|
| 1/20 EC <sub>50</sub> | 1/20th of the concentration that causes a 50% reduction in reproduction during a 21-d, chronic exposure                      |
| 1/10 EC <sub>50</sub> | 1/10th of the concentration that causes a 50% reduction in reproduction during a 21-d, chronic exposure                      |
| 1/10 LC <sub>50</sub> | 1/10th of the concentration that causes a 50% reduction in survival during a 24-h, acute exposure                            |
| NOEC                  | The highest concentration that does not cause a significant ( $p > 0.05$ ) reduction in survival after a 24-h acute exposure |

Exposure levels were chosen based on acute (24-h) and chronic (21-d) toxicity endpoints. These levels were chosen to represent a tolerated concentration (1/20 EC<sub>50</sub> or 1/10 EC<sub>50</sub>), a sublethal concentration (1/10 LC<sub>50</sub>), and a nearly acutely toxic concentration (NOEC).

**Table S2:** Primer sequences used for *Real-time* qPCR confirmation of microarray data

| Accession Number | Predicted Function                         | Primer Sequences                              |
|------------------|--------------------------------------------|-----------------------------------------------|
| DV437798         | Monooxygenase                              | CCATGTCGACGTCTTTCTGA<br>AGGCCTGATGACAACGTCTT  |
| DV437830         | Glutathione-S-transferase (GST)            | TCAGGCTGGTGTGAGTTTG<br>GAGCAAGCATTGTCCATCA    |
| DV437806         | Inositol monophosphatase (IMPase)          | CATGCAGGCAACATAATTCTG<br>CTGTTGAGCTCTGCGATCAG |
| DV437797         | Cellulase                                  | TTCCAGTTTCCAGGTTGACA<br>GGACGTAGAAACGACGGAAT  |
| ES408209         | Preamylase                                 | CGACATTATCTCGGGCAACT<br>AGGCCTTTCATCAGATCCT   |
| DV437805         | Slit homolog                               | GTCGATTTTTTCGGTCCTCAA<br>AGGTCAGGCAGTGTTCGAT  |
| DV437826         | Metallothionien (MT a)                     | TTGCCAAAACAATTGCTCAT<br>CACCTCCAGTGGCACAAAT   |
| DV437799         | Metallothionien (MT b)                     | GTGGAACCGAATGCAAATG<br>TGCATGGACAACTGGAACGT   |
| DV437813         | Lectin                                     | TTTCGTGCTACTGCGCTACT<br>GCTCCTTCTCGTACGTTTCC  |
| DV437823         | $\beta$ -1,3-glucan binding protein (BGBP) | ATCGCTACCAACTGGAATGG<br>GACGTACCGAGTTCCAGAA   |
| DV437858         | Chitinase                                  | CGAAACCACGTTCAAGATCA<br>CAAGCCGGTGAATTTACGAT  |
| AF070104         | 18S rRNA                                   | TGTATCCCAACGCCTGAATA<br>CCGAGGTCCTATTCCATCAT  |

Primer pairs for *real time* PCR were designed using Primers3 software (1) according to the recommendations of Applied Biosystems for the SYBR GREEN PCR based assay. (Source code available for Primers3 at <http://fokker.wi.mit.edu/primer3/>)

**Table S3:** Candidate Differentially Expressed Genes

| PROTEIN HOMOLOG                              | NCBI Acc# | 1/20EC50 Cu | 1/10EC50 Cu | 1/10LC50 Cu | NOEC Cu | 1/10 EC50 Cd | 1/10LC50 Cd | NOEC Cd | 1/10 EC50 Zn | 1/10LC50 Zn | NOEC Zn |
|----------------------------------------------|-----------|-------------|-------------|-------------|---------|--------------|-------------|---------|--------------|-------------|---------|
| <b>Digestion</b>                             |           |             |             |             |         |              |             |         |              |             |         |
| Q95YH1: Cellulase                            | DV437797  | -0.296      | -1.134      | -1.422      | -2.475  | -0.129       | -1.380      | -2.056  | 0.314        | -1.110      | -2.381  |
| AAO17927: $\alpha$ -amylase                  | DV437794  | -0.185      | 0.918       | -0.881      | -1.290  | 0.026        | 0.972       | -0.250  | 0.334        | -1.120      | -0.550  |
| Q26193: Preamylase 1 pre.                    | DV437815  | -0.169      | -0.503      | -0.656      | -0.979  | 0.195        | -0.333      | 0.212   | 0.209        | -1.213      | -0.802  |
| QRWPI2: Endo- $\beta$ -1,4-mannanase         | DV437795  | -0.219      | -0.977      | -1.016      | -0.949  | -0.012       | -0.890      | -0.923  | 0.378        | -0.848      | -1.712  |
| XM_792007: Hydrolase                         | ES408267  | -0.071      | -0.581      | -0.309      | -0.903  | -0.102       | -0.253      | -0.194  | 0.211        | -0.156      | -0.884  |
| Q9BH22: Endo- $\beta$ -1,4-glucanase         | DV437796  | -0.080      | -0.519      | -1.009      | -0.638  | -0.057       | -0.586      | -0.533  | 0.404        | -0.775      | -1.071  |
| AY081706: Cellobiohydrolase I                | ES408211  | -0.020      | -0.393      | -0.120      | -0.532  | -0.033       | -0.141      | -0.534  | 0.120        | -0.110      | -0.483  |
| Q9TU53: Cubilin                              | DV437819  | -0.020      | -0.151      | -0.435      | -0.517  | 0.212        | -0.184      | -0.597  | -0.020       | 0.236       | -0.150  |
| <b>Peptidases</b>                            |           |             |             |             |         |              |             |         |              |             |         |
| AAH64208: Trypsin II precursor               | DV437844  | -0.079      | 0.183       | -0.405      | -0.482  | 0.094        | -0.642      | -0.143  | 0.035        | -0.587      | -0.008  |
| Q9MRH5: Serine protease                      | DV437843  | -0.014      | 0.266       | 0.316       | -0.116  | 0.049        | -0.636      | -0.007  | -0.011       | -0.213      | 0.242   |
| Q9VZ49: Serine protease                      | DV437842  | -0.102      | -0.565      | -0.356      | -0.417  | -0.052       | -0.578      | -0.905  | 0.159        | -0.493      | 0.068   |
| Q27761: Trypsin precursor                    | DV437836  | -0.200      | -0.083      | 0.123       | -1.100  | 0.028        | -0.554      | -0.726  | 0.250        | -0.381      | -1.072  |
| Q46137: Chymotrypsin precursor               | DV437834  | -0.049      | 0.461       | -0.199      | -0.854  | 0.065        | -0.546      | 0.015   | 0.088        | -0.797      | 0.231   |
| Q8I0P2: Trypsin                              | DV437840  | -0.161      | -0.194      | -0.250      | -1.026  | -0.023       | -0.469      | -0.942  | 0.130        | 0.290       | -0.625  |
| Q7QWQ3: Serine protease                      | DV437839  | 0.033       | 0.170       | 0.060       | -0.428  | 0.032        | -0.484      | -0.251  | 0.086        | -0.146      | -0.043  |
| AF486488: Trypsin                            | ES408193  | 0.211       | 0.119       | 0.124       | 0.493   | 0.029        | 0.483       | 0.821   | 0.294        | 0.212       | 1.118   |
| Q27824: Serine collagenase 4                 | DV437841  | -0.333      | -0.203      | -0.195      | -1.208  | -0.090       | -0.344      | -0.905  | 0.173        | 0.397       | -1.185  |
| P36178: Chymotrypsin BII pre.                | DV437803  | -0.309      | -0.030      | -0.176      | -1.113  | -0.070       | -0.332      | -0.627  | 0.167        | 0.676       | -1.097  |
| BX050019: Carboxypeptidase                   | ES408205  | -0.659      | -           | -0.202      | -1.152  | 0.221        | -0.369      | -1.092  | 0.305        | 0.416       | -1.221  |
| Q8I8P2: Trypsin                              | DV437853  | -0.132      | 0.282       | 0.255       | 0.064   | -0.044       | -0.022      | -0.238  | 0.115        | 0.808       | -0.131  |
| Q9V3M3: Zn metallopeptidase                  | DV437822  | -0.165      | -0.502      | -0.675      | -1.328  | -0.126       | 0.017       | -0.381  | 0.258        | 0.434       | -1.303  |
| Q9N516: Aminopeptidase                       | DV437812  | 0.061       | 0.161       | 0.399       | 0.643   | -0.088       | 0.021       | 0.574   | 0.090        | -0.150      | -0.580  |
| NM_001002217: Carboxypeptidase               | DV437854  | -0.230      | 0.193       | -0.011      | -0.572  | 0.105        | 0.058       | -0.296  | 0.200        | 0.759       | -1.075  |
| AY795054: Endopeptidase                      | ES408379  | -0.086      | 0.046       | 0.340       | 1.414   | 0.172        | 0.146       | 0.984   | 0.012        | -0.090      | 1.119   |
| <b>Metal binding and transport</b>           |           |             |             |             |         |              |             |         |              |             |         |
| Q9IUS3: Ferritin subunit                     | DV437849  | -0.080      | -0.187      | -0.342      | -0.359  | 0.045        | -0.688      | -0.625  | 0.096        | -0.330      | -0.311  |
| AY297897: Ferritin                           | DV437852  | 0.047       | -0.325      | -0.279      | -0.458  | -0.009       | -0.663      | -0.718  | 0.038        | -0.160      | -0.215  |
| Q9DUJ4: Heavy metal binding                  | DV437835  | -0.085      | -0.144      | -0.334      | -0.768  | -0.163       | -0.463      | -0.196  | 0.051        | -0.385      | -0.640  |
| AAC47544: Hemoglobin                         | U67067    | -0.403      | -0.189      | 0.000       | -0.531  | -0.574       | 0.000       | -0.091  | 0.512        | -0.506      | 0.704   |
| NM_200198: Heme binding protein              | ES408214  | -0.040      | 0.333       | 0.078       | 1.215   | 0.049        | 0.102       | 0.591   | 0.054        | -0.235      | 0.085   |
| Q9NA01: Ferritin                             | AJ292556  | -0.004      | 0.283       | 0.591       | 0.426   | 0.021        | 0.478       | 0.670   | 0.070        | 0.291       | -0.039  |
| No homology (MT)                             | DV437799  | 0.198       | 0.513       | 0.642       | 1.249   | 0.121        | 0.710       | 0.959   | 0.004        | 0.575       | 0.347   |
| Q20441: Unknown (MT)                         | DV437826  | 0.064       | -0.144      | 0.319       | 0.711   | 0.006        | 1.081       | 1.268   | -0.321       | 0.437       | 0.694   |
| <b>Exoskeletal proteins</b>                  |           |             |             |             |         |              |             |         |              |             |         |
| AAH00393: Cuticle protein                    | DV437856  | 0.106       | -0.274      | 0.036       | -0.020  | -0.087       | -0.068      | -0.136  | -0.448       | -1.247      | -0.403  |
| Q7PWC2: Chitinase                            | DV437857  | 0.126       | -0.116      | 0.068       | -0.159  | 0.076        | 0.073       | 0.923   | 0.119        | -1.121      | -0.953  |
| AF026491: Chitinase                          | DV437850  | 0.090       | -0.122      | 0.054       | -0.130  | 0.079        | 0.070       | 0.923   | 0.120        | -1.123      | -0.915  |
| Q7PRG6: Chitin binding                       | DV437800  | -0.147      | -0.021      | 0.050       | -1.151  | 0.137        | -0.610      | -0.256  | 0.035        | -0.458      | -0.397  |
| Q9V7Z2: Chitin binding                       | DV437850  | 0.149       | 0.072       | 0.225       | 0.602   | 0.078        | -0.468      | 0.109   | 0.093        | 0.409       | 0.347   |
| P91731: Chitinase                            | DV437809  | 0.131       | 0.228       | 0.431       | -0.253  | 0.059        | -0.306      | -0.062  | 0.176        | -0.393      | 0.000   |
| XM_318997: Cuticle protein                   | ES408180  | 0.231       | -0.092      | 0.076       | -0.854  | 0.529        | -0.055      | 0.257   | 0.501        | -0.153      | -0.036  |
| EF203462: Cuticle protein                    | ES408177  | -0.202      | 0.555       | 0.071       | -1.191  | 0.814        | 0.106       | 0.294   | 0.411        | 0.047       | 0.131   |
| XM_318987: Cuticle protein                   | ES408178  | -0.029      | 0.446       | -0.120      | -1.505  | 0.735        | 0.036       | 0.052   | 0.341        | 0.054       | 0.130   |
| XM_00119659: Cuticle                         | ES408165  | -0.051      | 0.472       | -0.056      | -0.944  | 0.895        | 0.158       | 0.363   | 0.201        | 0.132       | 0.158   |
| AE003563: Cuticle protein                    | ES408176  | -0.146      | 0.489       | -0.080      | -1.745  | 0.694        | 0.035       | 0.029   | 0.297        | 0.192       | -0.033  |
| AY432732: Cuticle protein                    | ES408164  | -0.242      | 0.911       | -0.135      | -1.668  | 1.517        | 0.030       | 0.124   | 0.396        | 0.171       | 0.416   |
| <b>Reproductive function and development</b> |           |             |             |             |         |              |             |         |              |             |         |
| CR688752: Placental protein                  | ES408215  | -0.191      | -0.618      | -0.408      | -0.313  | -0.087       | -0.413      | -1.041  | 0.170        | -0.591      | 0.062   |
| RAD05137: Vitellinogen SOD                   | AB114859  | -0.284      | -0.523      | -0.323      | -0.836  | -0.137       | -0.701      | -1.007  | 0.025        | -0.064      | -0.095  |
| U56966: Vitellinogen                         | ES408219  | -0.455      | -0.610      | -0.190      | -1.527  | -0.690       | -0.452      | -1.007  | -0.158       | -0.192      | -0.799  |
| AB252738: Vitellinogen-SOD2                  | ES408217  | -0.869      | -0.532      | -0.218      | -0.700  | -0.711       | -0.277      | -0.912  | -0.384       | -0.255      | -0.853  |
| AB114859: VTG-SOD                            | AB114860  | -0.316      | -0.380      | -0.232      | -0.680  | -0.214       | -0.314      | -0.735  | -0.073       | -0.118      | -0.595  |
| Q84440: Posterior end mark                   | DV437824  | 0.103       | -0.252      | -0.524      | -0.520  | 0.455        | -0.582      | -0.668  | -0.034       | -0.401      | -0.785  |
| Q9VEY6: Hormone reg. peptidase               | DV437846  | 0.045       | 0.334       | 0.262       | -0.082  | 0.044        | -0.640      | -0.353  | -0.017       | -0.332      | 0.187   |
| Q7Z407: CUB and sushi                        | DV437847  | -0.099      | 0.346       | -0.169      | -0.412  | -0.020       | -0.335      | -0.293  | 0.035        | 0.021       | -0.132  |
| <b>Monoxygenases</b>                         |           |             |             |             |         |              |             |         |              |             |         |
| NM_000016: Acyl coA dehydrogenase            | ES408245  | 0.070       | 0.988       | 0.049       | 1.894   | 0.848        | 0.053       | 0.367   | 0.325        | 0.084       | 0.366   |
| Q95VU5: Dopa $\beta$ -hydroxylase            | DV437820  | 0.020       | -0.329      | -0.451      | -0.548  | 0.439        | -0.437      | -0.638  | -0.038       | -0.485      | -0.400  |
| Q26490: Retinol dehydratase                  | DV437801  | 0.298       | -0.074      | 1.107       | 1.159   | 0.123        | 0.277       | 0.000   | 0.198        | -0.774      | -0.740  |
| Q8BUZ7: Monoxygenase X                       | DV437798  | 0.097       | 1.023       | 0.291       | 2.271   | -0.003       | 1.519       | 1.760   | -0.013       | 0.548       | 1.597   |
| <b>Immune Function</b>                       |           |             |             |             |         |              |             |         |              |             |         |
| Q7QCT4: $\beta$ -1,3-glucan binding          | DV437823  | -0.251      | -0.809      | -0.756      | -1.639  | 0.019        | -0.299      | -0.849  | 0.274        | -0.287      | -1.531  |
| Q8IUN9: Macrophage lectin                    | DV437813  | -0.147      | -0.350      | -0.440      | -0.613  | -0.017       | -0.298      | -0.394  | -0.110       | -0.161      | -0.633  |
| <b>Oxidative Stress Response</b>             |           |             |             |             |         |              |             |         |              |             |         |
| Q8T5Q7: Peroxiredoxin V                      | DV437829  | 0.082       |             | 0.178       | 0.384   | -0.445       | 0.619       | 0.425   | 0.040        | 0.347       | 0.031   |
| P46436: Glutathione S-transferase            | DV437830  | -0.038      | 0.051       | 0.108       | 1.060   | 0.074        | 0.482       | 0.727   | 0.023        | 0.187       | 0.011   |
| Q9NAW7: Glutathione S-transferase            | DV437833  | -0.017      | 0.391       | 0.306       | 0.118   | 0.067        | 0.608       | 0.541   | 0.033        | 0.380       | 0.034   |
| <b>Cell signaling</b>                        |           |             |             |             |         |              |             |         |              |             |         |
| Q9PT14: Precerebellin-like                   | DV437848  | -0.122      | -0.127      | -0.486      | -1.291  | -0.106       | -0.747      | -0.674  | 0.192        | -0.623      | -1.748  |
| Q9VAG9: Inositol monophosphatase             | DV437906  | 0.140       | 0.204       | 0.634       | 0.846   | 0.000        | 0.156       | 0.441   | 0.014        | -0.497      | 0.570   |
| P51150: Ras-related, Rab-7                   | DV437832  | 0.072       | 0.529       | 0.335       | 1.388   | -0.041       | 0.435       | 0.936   | 0.072        | 0.261       | 0.697   |
| XM_647306: Cell division kinase              | ES408226  | -0.112      | 0.271       | 0.285       | 1.298   | 0.104        | 0.316       | 0.882   | -0.083       | -0.018      | 0.552   |
| Q7QB55: Protein kinase                       | DV437828  | 0.136       | -0.150      | 0.162       | 0.746   | 0.098        | 0.634       | 1.216   | -0.225       | 0.271       | 0.753   |

| PROTEIN HOMOLOG                          | NCBI Acc# | 1/20EC50 Cu | 1/10EC50 Cu | 1/10LC50 Cu | NOEC Cu | 1/10 EC50 Cd | 1/10LC50 Cd | NOEC Cd | 1/10 EC50 Zn | 1/10LC50 Zn | NOEC Zn |
|------------------------------------------|-----------|-------------|-------------|-------------|---------|--------------|-------------|---------|--------------|-------------|---------|
| <b>Lipid metabolism and transport</b>    |           |             |             |             |         |              |             |         |              |             |         |
| AA864350: Sphingolipid metabolism        | DV437837  | -0.153      | -0.140      | -0.320      | -1.122  | -0.161       | -0.500      | -1.185  | 0.175        | 0.006       | -1.284  |
| Q81896: Heart fatty acid binding         | DV437817  | -0.161      | -0.411      | -0.522      | -0.734  | -0.033       | -0.353      | -0.849  | -0.078       | -0.266      | -0.666  |
| AA139384: Fatty acid binding             | DV437804  | -0.201      | -0.182      | -0.162      | -1.348  | 0.078        | -0.067      | -0.316  | 0.129        | -0.441      | -0.547  |
| AY270214: Fatty acid binding             | ES408221  | -0.370      | -0.420      | -0.218      | -0.493  | -0.484       | -0.374      | -0.818  | -0.406       | -0.262      | -0.786  |
| <b>Other functions</b>                   |           |             |             |             |         |              |             |         |              |             |         |
| AAQ83892: Interferon $\gamma$ -inducible | DV437831  | 0.924       | 0.378       | 0.358       | 0.534   | 0.114        | 0.446       | 0.836   | 0.059        | 0.079       | 0.182   |
| AJ304447: Serine protease inhibitor      | ES408189  | -0.063      | 0.110       | 0.146       | 1.595   | 0.130        | 0.046       | 0.927   | -0.010       | -0.333      | 0.284   |
| AY522647: Glutamine synthetase-like      | ES408260  | -0.119      | 0.885       | -0.084      | -1.716  | 1.011        | 0.089       | 0.401   | 0.272        | 0.011       | 0.364   |
| NM_137626: Guanine nucleotide exchar     | ES408233  | -0.094      | 0.827       | 0.014       | -1.482  | 0.908        | 0.141       | 0.471   | 0.203        | 0.091       | 0.368   |
| NM_199989: Aspartate aminotransferase    | ES108259  | 0.176       | 0.227       | 0.097       | 0.747   | 0.027        | 0.348       | 0.708   | 0.009        | 0.126       | 0.776   |
| AY642708: NADH dehydrogenase             | ES408243  | 0.072       | 0.501       | 0.010       | -0.802  | 0.012        | 0.100       | 0.436   | 0.170        | -0.140      | 0.157   |
| Q8ZY35: NADH dehydrogenase               | DV437845  | 0.030       | -0.036      | -0.297      | -0.569  | -0.110       | -0.403      | -0.778  | 0.077        | -0.076      | -0.705  |
| U36394: Ornithine decarboxylase          | ES408263  | -0.032      | 0.112       | 0.272       | 2.092   | -0.113       | 0.151       | 1.113   | -0.034       | -0.436      | 0.270   |
| XM_341636: Carboxylesterase              | ES108269  | 0.034       | 0.432       | 0.431       | 1.028   | 0.029        | 0.265       | 0.799   | 0.246        | 0.081       | 1.520   |
| Q7FPX0: Sulfotransferase                 | DV437802  | 0.159       | -0.026      | 0.431       | 0.594   | 0.241        | 0.284       | 0.577   | 0.094        | -0.021      | 0.010   |
| Q7ZYH0: Sulfotransferase                 | DV437811  | 0.185       | -0.026      | 0.382       | 0.358   | 0.110        | 0.250       | 0.454   | 0.061        | -0.016      | 0.180   |
| AY572863: Actin                          | ES408251  | -0.022      | 0.392       | -0.167      | -1.677  | 0.524        | 0.138       | 0.325   | 0.259        | 0.129       | 0.166   |
| <b>Unknown function</b>                  |           |             |             |             |         |              |             |         |              |             |         |
| Q8Z7T2: unknown                          | DV437814  | 0.495       | 0.008       | -0.676      | 0.187   | 0.557        | -0.527      | 0.403   | -0.032       | -1.531      | 0.239   |
| AP006275: unknown                        | DV437837  | -0.205      | -0.174      | -0.320      | -1.438  | -0.177       | -0.424      | -1.217  | 0.178        | -0.074      | -1.408  |
| XM_546676: unknown                       | ES108222  | 0.010       | 0.502       | 0.296       | 0.683   | 0.134        | 0.461       | 0.276   | 0.008        | 0.081       | 0.674   |
| XM_364913: unknown                       | ES408299  | -0.204      | -0.160      | -0.285      | -1.173  | 0.038        | -0.354      | -0.882  | -0.134       | -0.173      | -0.943  |
| Q8I292: unknown                          | DV437851  | -0.226      | -0.336      | -0.171      | -1.130  | 0.066        | -0.636      | -0.639  | -0.016       | 0.076       | -0.909  |
| Q9VRS7: unknown                          | DV437855  | -0.306      | 0.133       | -0.089      | -0.909  | 0.009        | -0.319      | -0.626  | 0.194        | 0.739       | -1.330  |
| AL034583: glycine rich protein           | ES108183  | 0.024       | 0.096       | 0.103       | 1.293   | 0.031        | 0.140       | 0.181   | 0.150        | 0.004       | 0.350   |
| AE003705: unknown                        | ES408189  | 0.011       | 0.107       | 0.177       | 1.482   | 0.016        | 0.039       | 1.109   | -0.014       | -0.460      | 0.120   |
| Q7Q8R2: unknown                          | DV437810  | -0.025      | 0.043       | 0.361       | 0.490   | -0.035       | 0.352       | 0.961   | -0.175       | -0.010      | 0.897   |
| Q8YA32: unknown                          | DV437808  | 0.063       | 0.692       | 0.444       | 1.001   | 0.007        | 0.183       | 1.014   | -0.011       | -0.225      | 0.971   |
| Q9VSES: unknown                          | DV437807  | 0.060       | 0.189       | 0.696       | 0.584   | 0.010        | 0.140       | 0.489   | 0.084        | 0.412       | 0.194   |
| <b>No homology</b>                       |           |             |             |             |         |              |             |         |              |             |         |
| no homology                              | ES408276  | -0.126      | -0.342      | -0.283      | -1.061  | 0.001        | -0.279      | -0.889  | 0.086        | 0.171       | -0.779  |
| no homology                              | DV437818  | 0.158       | 0.039       | 0.465       | 1.283   | 0.302        | 0.326       | 0.312   | 0.210        | 0.095       | 0.557   |
| no homology                              | ES408296  | -0.130      | -0.471      | -0.327      | -1.253  | 0.070        | -0.304      | -0.957  | 0.023        | 0.170       | -0.990  |
| no homology                              | ES408233  | -0.005      | 0.476       | 0.091       | -1.214  | 0.733        | 0.144       | 0.232   | 0.085        | 0.197       | 0.066   |
| no homology                              | ES408179  | -0.739      | -0.419      | -0.294      | -1.079  | -0.486       | -0.468      | -0.563  | -0.187       | -0.221      | -0.722  |
| no homology                              | ES108296  | 0.168       | 0.089       | 0.444       | 1.016   | 0.068        | 0.045       | 0.503   | 0.232        | 0.033       | 1.144   |
| no homology                              | ES408225  | -0.147      | 0.425       | -0.137      | -0.879  | 0.805        | -0.149      | 0.362   | -0.060       | 0.063       | -0.440  |
| no homology                              | ES408268  | 0.090       | 0.528       | -0.014      | -0.860  | 0.541        | -0.154      | 0.571   | -0.260       | 0.176       | -0.206  |
| no homology                              | DV437816  | -0.083      | -0.166      | -0.443      | -0.789  | 0.043        | 0.047       | -0.243  | 0.142        | 0.233       | -0.670  |
| no homology                              | ES108223  | 0.021       | 0.485       | 0.146       | 0.648   | 0.722        | 0.147       | 0.185   | 0.088        | 0.076       | 0.479   |
| no homology                              | AJ292556  | 0.037       | 0.454       | 0.031       | -0.020  | 0.407        | 0.100       | 0.436   | -0.168       | 0.217       | -0.403  |
| no homology                              | ES408221  | -0.370      | -0.392      | -0.162      | -0.574  | -0.650       | -0.323      | -0.808  | -0.316       | -0.150      | -0.836  |
| no homology                              | ES408284  | -0.373      | -0.657      | -0.237      | -0.155  | -0.153       | -0.137      | -0.501  | 0.054        | 0.142       | -0.088  |
| no homology                              | ES108285  | 0.236       | 0.747       | 0.100       | 0.925   | 0.269        | 0.092       | 0.180   | 0.398        | 0.179       | 0.409   |
| no homology                              | ES408269  | 0.102       | 0.026       | 0.106       | 1.211   | -0.110       | 0.030       | 0.650   | -0.043       | -0.100      | 0.670   |
| no homology                              | ES408293  | -0.377      | -0.527      | -0.022      | 1.331   | -0.364       | 0.000       | 0.149   | -0.575       | -0.164      | 0.375   |
| no homology                              | DV437805  | -0.046      | 0.672       | 0.437       | 1.162   | -0.031       | 0.111       | 1.143   | -0.043       | -0.250      | 1.055   |
| no homology                              | ES108234  | 0.120       | 0.136       | 0.279       | 1.738   | 0.189        | 0.301       | 0.482   | -0.127       | 0.173       | 0.026   |

Six independent microarray hybridizations were carried out for each of exposure concentration.

Candidate differentially expressed genes were determined using the method of Loginov *et al.* (2).

Clones which were differentially expressed in at least 4 of the 6 microarray hybridizations were chosen as candidate differentially expressed genes. Green represents down-regulated differentially expressed genes, and red represents up-regulated differentially expressed genes.

Shown here is the average  $\log_2$  ratio for the six microarray hybridizations.

Table S4: Quantitative Reverse Transcription PCR (q-RT-PCR) confirmation of microarray gene expression ratios

|                      |          |          | 1/20EC50<br>Cu | 1/10LC50<br>Cu | NOEC<br>Cu | 1/10EC50<br>Cd | 1/10LC50<br>Cd | NOEC<br>Cd | 1/10EC50<br>Zn | 1/10LC50<br>Zn | NOEC<br>Zn |
|----------------------|----------|----------|----------------|----------------|------------|----------------|----------------|------------|----------------|----------------|------------|
| <b>Monooxygenase</b> | DV437798 | μarray   | 0.10           | 1.23           | 2.20       | 0.01           | 1.49           | 1.75       | -0.01          | 0.54           | 1.52       |
|                      |          | q-RT-PCR | 1.09           | 2.32           | 2.45       | 0.52           | 2.87           | 1.54       | 0.25           | 0.00           | 0.40       |
| <b>GST1</b>          | DV437830 | μarray   | -0.04          | 0.11           | 1.06       | 0.07           | 0.48           | 0.73       | 0.02           | 0.19           | 0.01       |
|                      |          | q-RT-PCR | 1.33           | 0.49           | -0.27      | -0.25          | 1.00           | -0.50      | 0.68           | -0.29          | -0.40      |
| <b>IMPase</b>        | DV437806 | μarray   | 0.14           | 0.60           | 0.85       | 0.06           | 0.16           | 0.44       | 0.01           | -0.49          | 0.57       |
|                      |          | q-RT-PCR | 0.06           | 0.49           | -0.04      | 0.23           | -0.67          | -0.60      | 0.23           | -0.34          | -0.20      |
| <b>Cellulase</b>     | DV437797 | μarray   | -0.30          | -1.42          | -2.47      | -0.13          | -1.38          | -2.06      | 0.31           | -1.11          | -2.38      |
|                      |          | q-RT-PCR | 0.85           | -1.31          | -2.80      | 0.19           | -1.17          | -3.46      | 0.08           | -2.28          | -2.83      |
| <b>Slit homolog</b>  | DV437805 | μarray   | -0.05          | 0.44           | 1.16       | -0.03          | 0.11           | 1.14       | -0.04          | -0.25          | 1.07       |
|                      |          | q-RT-PCR | 0.58           | 3.24           | 1.26       | -0.35          | 2.44           | 1.03       | 0.38           | 2.32           | -0.22      |
| <b>MT (b)</b>        | DV437799 | μarray   | 0.20           | 0.64           | 1.25       | 0.12           | 0.71           | 0.96       | 0.00           | 0.58           | 0.35       |
|                      |          | q-RT-PCR | 2.26           | 2.37           | 1.53       | 0.41           | 1.78           | 1.22       | 0.31           | 1.70           | 0.24       |
| <b>unknown</b>       | ES408276 | μarray   | -0.13          | -0.28          | -1.06      | 0.00           | -0.28          | -0.69      | 0.07           | 0.17           | -0.78      |
|                      |          | q-RT-PCR | 1.63           | 0.01           | -0.92      | 0.56           | -0.28          | -1.14      | 0.49           | -0.48          | -1.46      |
| <b>Preamylase</b>    | ES408209 | μarray   | 0.06           | -0.65          | -1.18      | 0.13           | -0.29          | 0.04       | 0.19           | -0.84          | -0.70      |
|                      |          | q-RT-PCR | 1.63           | 0.19           | -1.29      | 0.39           | 0.32           | -1.32      | 0.01           | -0.33          | -1.91      |
| <b>Chitinase</b>     | DV437858 | μarray   | 0.10           | 0.05           | -0.14      | 0.08           | 0.07           | 0.93       | 0.13           | -1.12          | -0.91      |
|                      |          | q-RT-PCR | 1.13           | -1.47          | -2.45      | 0.45           | -0.71          | -3.03      | 1.24           | -1.99          | -2.64      |

*D. magna* were exposed to each exposure concentration for 24-h. Following the exposure, RNA was isolated and reverse transcribed. qPCR was carried out on the cDNA using SYBR Green as described in the methods section. Log<sub>2</sub> ratios from the q-RT-PCR analysis are compared to the averaged log<sub>2</sub> ratios for the microarray experiments. Genes significantly differentially expressed for a given condition are shown in red for upregulated genes or green for downregulated genes.

Table S5: Estimation of the NOTEL

| Probability | Concentration (µg/L) | Concentration lower (µg/L) | Concentration upper (µg/L) | Response lower | Response upper |
|-------------|----------------------|----------------------------|----------------------------|----------------|----------------|
| 0.0005      | 0.20                 | 0.07                       | 0.58                       | 1.25           | 5.00           |
| 0.0010      | 0.58                 | 0.26                       | 1.30                       | 2.93           | 8.52           |
| 0.0015      | 1.07                 | 0.55                       | 2.09                       | 4.82           | 11.66          |

Estimation of the NOTEL is a maximum concentration which gives a response whose 95% CIs are still overlapping with 95% CIs for the estimate of noise (in unexposed versus unexposed controls). For Cu, the estimation for noise was found to be 1.64 [0.000, 3.19] differentially expressed genes at average; therefore, the NOTEL was estimated using the table above to be 0.58 µg/L because it was the highest concentration whose 95% CIs for differentially expressed genes [2.93, 8.52] overlapped with the 95% CI for noise.

Probability - predicted probability to be differentially expressed at a given concentration (response),

Concentration - Concentration on original scale,

Concentration lower - lower 95% confidence limits for concentration,

Concentration upper - upper 95% confidence limits for concentration,

Response lower - lower 95% confidence limits for the response shown as the number of differentially expressed genes,

Response upper - upper 95% confidence limits for the response shown as the number of differentially expressed genes.

## References:

1. Rozen, S.; Skaletsky, H. Primer3 on the WWW for general users and for biologist programmers. *Methods Mol Biol* **2000**, *132*, 365-386.
2. Loguinov, A. V.; Mian, I. S.; Vulpe, C. D. Exploratory differential gene expression analysis in microarray experiments with no or limited replication. *Genome Biol.* **2004**, *5*, R18.

## Figure Legends

**Figure S1:** Exposure and microarray hybridization experimental design. Three replicate exposures (exp) were performed for each metal concentration on separate dates. A zero concentration control (ctrl) was performed alongside each metal exposure, so that each exposure had a complimentary unexposed control for microarray hybridization. Following each 24-hour exposure, *D. magna* were collected and RNA was extracted for microarray hybridizations. Before proceeding to reverse transcription, RNA from both the unexposed and exposed *D. magna* was split into two pools, to provide two dye-swapped technical replicates for each metal exposure. Because three exposures were performed for each metal, and RNA from each exposure was hybridized to two different microarrays, there were six hybridizations for each exposure condition.

**Figure S2:** Acute and chronic toxicity of metals to *Daphnia magna*. *D. magna* were exposed to varying concentrations of copper (A), cadmium (B), or zinc (C) for 24 hours (acute) or 21 days (chronic). Survival after acute exposure (●) and reproduction after chronic exposure (▲) are shown as percent of the control exposures. \* denotes concentrations that cause a significant decrease ( $p < 0.05$ ) in survival or reproduction from the control.

**Figure S3:** Quantitative Reverse Transcription PCR investigation of metallothionein genes following metal exposure. In each experiment, the expression level of each gene was normalized to 18S rRNA and is shown as the fold induction compared to an unexposed control. Metallothionein gene expression determined by q-RT-PCR is shown for two MT transcripts at different metal concentrations to illustrate the specificity of MT (a) (DV437826) and MT (b) (DV437799) and to confirm the gene expression patterns seen by microarray analysis. Error bars represent the standard deviation across three technical replicates.



Fig. S1

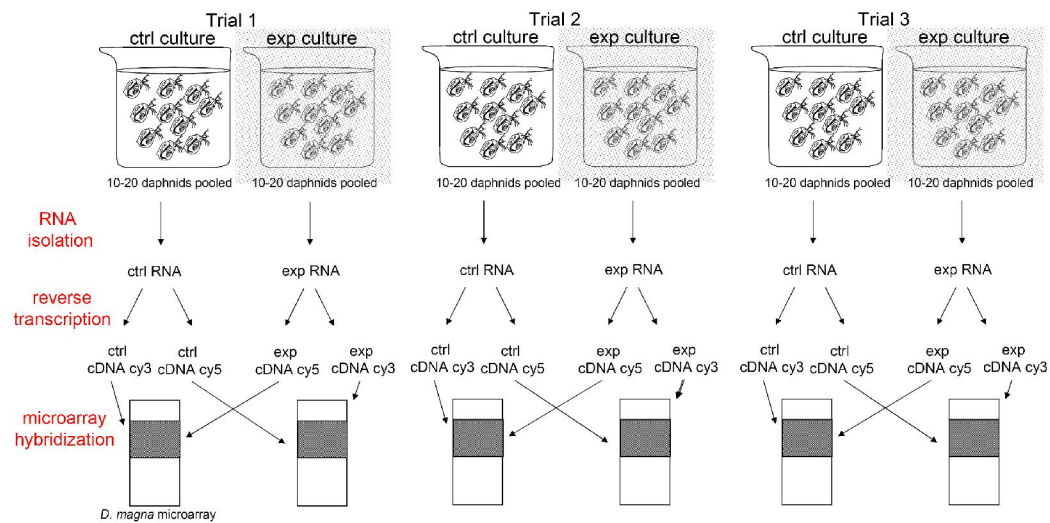

Fig. S2

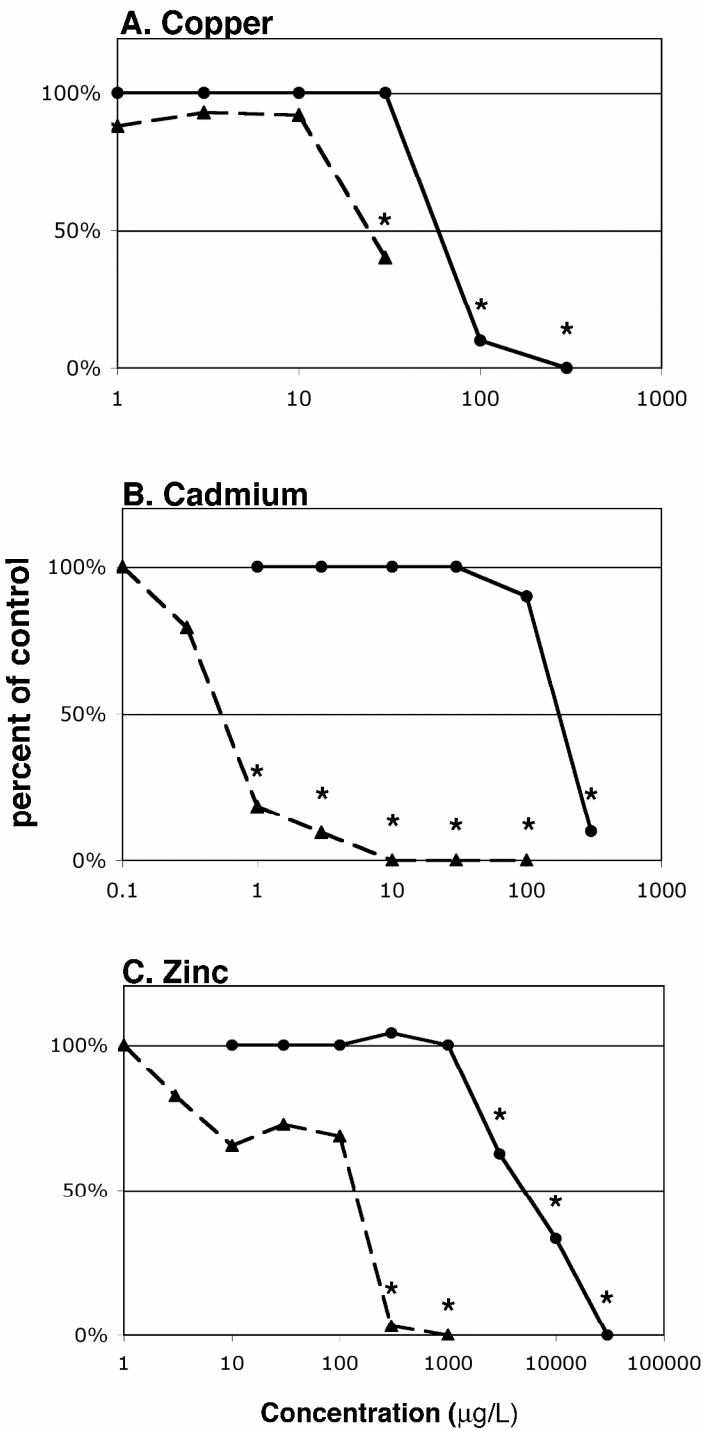

Fig. S3

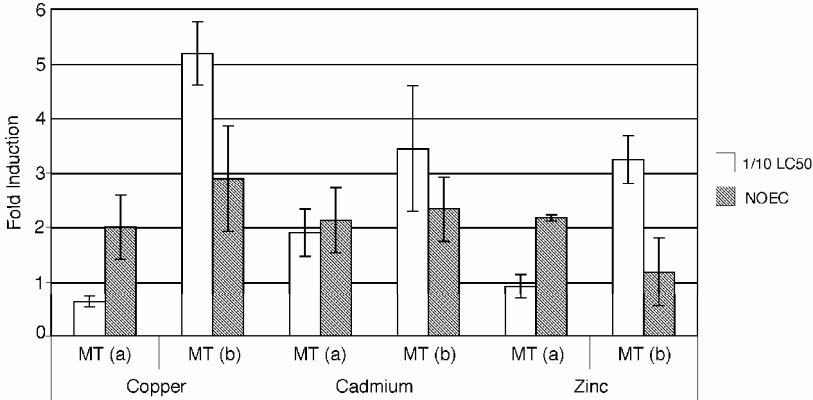

Supplement: Supplementary file 1 [file 3581676]
